1

2

3

4 Effects of carbon-based additive and ventilation rate on nitrogen loss and microbial  
5 community during chicken manure composting

6

7 Ruixue Chang <sup>1</sup> Yanming Li <sup>1\*</sup> Qing Chen <sup>1</sup> Xiaoyan Gong <sup>1</sup> Zicheng Qi <sup>2</sup>

8

9 <sup>1</sup>College of Resources and Environmental sciences, China Agricultural University, Beijing

10 100193, China;

11 <sup>2</sup>Shandong Academy of Agricultural Machinery Sciences, Jinan 250000, Shandong Province,

12 China

13

14

15 Corresponding author

16 Email: liym@cau.edu.cn, telephone number: +0086 010 62734299

17 Abstract : Aerobic composting is a sustainable method for recycling of chicken manure, while its  
18 unsuitable porosity and carbon to nitrogen ratio limit the oxygen supply, which must result in high  
19 nitrogen loss because of anaerobic micro-zones in the materials. Treatments with five carbon-based  
20 additives and two ventilation rates (0.18 and 0.36 L·min<sup>-1</sup>·kg<sup>-1</sup> DM) were set in chicken manure  
21 composting, to investigate their effects on biodegradation process, ammonia (NH<sub>3</sub>) emission,  
22 nitrogen loss, physiochemical properties and microbial community. The additives and ventilation  
23 rates influenced the CO<sub>2</sub> production from the 2<sup>nd</sup> week, meanwhile varied the physiochemical  
24 parameters all the process. No inhibitory effect on the maturity were observed in all treatments.  
25 With woody peat as additive, the NH<sub>3</sub> emission amount and nitrogen loss rate were shown as 15.86  
26 mg and 4.02 %, when compared with 31.08-80.13 mg and 24.26-34.24 % in other treatments. The  
27 high aeration rate increased the NH<sub>3</sub> emission and nitrogen loss, which were varied with different  
28 additives. The T-RFLP results showed that the additives and the ventilation rates changed the  
29 microbial community, while the prominent microbial clones belonged to the class of *Bacilli* and  
30 *Clostridia* (in the phylum of Firmicutes), and *Alphaproteobacteria*, *Deltaproteobacteria* and  
31 *Gammaproteobacteria* (in the phylum of Proteobacteria). *Bacillus spp.* was observed to be the most  
32 dominant bacteria in all the composting stages and treatments. We concluded that woody peat could  
33 improve chicken manure composting more than other additives, especially on controlling nitrogen  
34 loss. 0.18 L·min<sup>-1</sup>·kg<sup>-1</sup> DM was suitable for chicken manure composting with different additives.

35 **Keywords** : Chicken manure; composting; carbon-based additive; ventilation rate; microbial  
36 community

## 37 1. Introduction

38 Due to the rapid development of chicken farms in China, the output of chicken manure has risen  
39 sharply in the past decades, which was nearly 102 million tons (dry weight) in 2016 (Jia et al., 2018).  
40 The over production and accumulation of untreated chicken manure has caused a series of  
41 environmental and social problems (Shi et al., 2018). Recycling the chicken manure to arable land  
42 as fertilizers has been recognized as a sustainable utilization method, for chicken manure has high  
43 concentration of macro and micro nutrients than other livestock manure. Aerobic composting could  
44 effectively convert the livestock manure into fertilizer or amendments used to improve soil fertility  
45 and promote plant growth (Hageman et al., 2018). While the low contents of lignocellulose and low  
46 carbon to nitrogen ratio of chicken manure would limit the oxygen consumption and organic matter  
47 degradation during chicken manure composting (Wang et al., 2015), which may contribute to more  
48 nitrogen loss and anaerobic microdomains. Different additives and suitable rate of forced ventilation  
49 used to improve the porosity and C/N ratio could make great significance to reduce the emission of  
50 GHGs and NH<sub>3</sub>, mitigate the mobility of heavy metals, and conserve other essential nutrients for  
51 chicken manure composting (Awasthi et al., 2017; Mao et al., 2018). Many researches have  
52 confirmed the effects of additives such as zeolite (Awasthi et al., 2016; Chan et al., 2016), bentonite  
53 (Wang et al., 2016), medical stone (Wang et al., 2017), woody peat and biochar (Zhang et al., 2014;  
54 Awasthi et al., 2017; Chang et al., 2019b), saw dust (Sharma et al., 2018), pine bark (Brito et al.,  
55 2015) and peanut hull (Erickson et al., 2014), for various organic waste composting to mitigate the  
56 emission of NH<sub>3</sub> and GHGs and conserve the nutrients. However, the varied biodegradable organic  
57 matter content in these additives would significantly influence their improvement of composting  
58 process and the temperature (Chang et al., 2019a). Forced ventilation is used to supply adequate O<sub>2</sub>

59 during composting, which was found to result in lower GHG emissions when compared with  
60 physical turning and passive ventilation systems (Hao et al., 2001; Park et al., 2011). Most previous  
61 studies have reported that losses of NH<sub>3</sub> increase and CH<sub>4</sub> emissions decrease with increasing  
62 ventilation rate (Osada et al., 2000; Jiang et al., 2011; Shen et al., 2011). However, the values of  
63 N<sub>2</sub>O emissions in composting could not follow any trend when the increasing ventilation rate  
64 changes (Osada et al., 2000; Shen et al., 2011; Jiang et al., 2011). These inconsistent results may be  
65 caused by the different C and N dynamics and the O<sub>2</sub> consumption in various raw materials because  
66 of their different physicochemical characteristics and biodegradable organic matter content. In the  
67 present study, considering the probable influence of carbon-based additives and ventilation rates on  
68 composting and the nutrient loss, we carried out 2 series of 30-d chicken manure composting in a  
69 lab-scale composting system, to explore the effects of carbon-based additives with different  
70 biodegradable organic matter, and the effects of high and low ventilation rates with the same  
71 additives on CO<sub>2</sub> and NH<sub>3</sub> emissions, composting process and the microbial community changes.

## 72 2 Material and methods

### 73 2.1 Set-up of experiment

74 Chicken manure, corn straw, saw dust, pine bark and peanut hull were collected from local  
75 greenhouse and farmland in Beijing, China. The additives (corn straw, saw dust, pine bark, peanut  
76 hull) were air dried and cut into 2-3 cm pieces to obtain a uniform particle size that enabled good  
77 mixing. Woody peat was supplied by View Sino international Ltd., which was used in powder form.  
78 Main characteristics of the raw materials were shown in Table 1.  
79 The experiments were conducted in a bench-scale composting system (Fig. 1) in the lab of China

80 Agricultural University, designed to simulate the temperature changing without external effects (e.g.,  
81 heat loss) (Michel and Reddy, 1998; Meng et al., 2016). The system details were described in our  
82 previous study (Chang et al., 2019a). There were two series of treatments in our experiments, whose  
83 materials ratios were shown in Table 2.

## 84 2.2 Samples collection and analysis

85 During the process, solid samples were collected on the days of 0, 3, 7, 14, 21, 28 and 35 after  
86 mixing well. Each sample was thoroughly mixed and then divided into two parts: one part was air-  
87 dried to analyze physicochemical characteristics, like total nitrogen (TN) and ash content; the other  
88 part was stored in the freezer at -20 °C for determination of other parameters, like pH value, Electric  
89 Conductivity (EC), Germination Index (GI), extractable ammonium and microbial community.

90 A 1:5 aqueous extract (w/v) of the fresh composts with 2N KCl solution was used for the analysis  
91 of extractable ammonium (NH<sub>4</sub><sup>+</sup>-N), and NH<sub>4</sub><sup>+</sup>-N was analyzed by SEAL Analytical (BL-TECH).  
92 Measurement of other parameters and calculation methods were followed the methods shown in  
93 Chang et al. (2019a and 2019b).

## 94 2.3 Analysis of microbial community

95 Total community DNA was extracted from 0.5 g compost samples using the FastPrep DNA kit (MP  
96 Biomedicals, Santa Ana, CA) according to the manufacturer's protocol (Feng et al, 2012). The  
97 extracted DNA solutions were diluted in suitable times. The 16S rRNA genes were amplified using  
98 universal bacterial primers: 27f forward (5'-AGAGTTTGATCCTGGCTCAG-3') and 907r (5'-  
99 CCGTCAATTCMTTGTGAGTT -3') reverse. The 27f forward primer was labeled with 6-

100 carboxyfluorescein (FAM). Each PCR reaction mixture contained 50  $\mu$ l liquid: 37.5  $\mu$ l dd H<sub>2</sub>O, 10\*  
101 PCR reaction buffer 5 $\mu$ l (Tiangen Biotech, Beijing), dTNPs 4 $\mu$ l, 27f-FAM 0.75 $\mu$ l, 907r 1.5  $\mu$ l, BSA  
102 0.5 $\mu$ l, rTaq DNA polymerase 0.5  $\mu$ l (TakaRa), DNA template 2 $\mu$ l. The reaction mixture was  
103 incubated at 94°C for 4 min, and then cycled 30 times through three steps: denaturing (94 °C; 45  
104 s), annealing (52°C; 45 s), and primer extension (72°C; 60 s) in a PTC-100 thermal cycler. Then the  
105 last step is 10 mins' primer extension. Amplification product sizes were verified by electrophoresis  
106 in 2.0% agarose and ethidium bromide staining. To obtain sufficient DNA for T-RFLP analysis and  
107 to minimize PCR bias, amplicons from three PCR runs for each root sample were combined  
108 (Clement et al., 1998) and then purified using a PCR purification kit (PCR Clean-up Kit;  
109 PROMEGA Inc., Wisconsin, USA).

110 To construct bacterial 16S rRNA gene-based clone libraries, we prepared DNA samples extracted  
111 from five compost samples with the richest bacteria diversity from different additive treatments,  
112 respectively. The PCR amplification used the same primers as those indicated above. PCR products  
113 were purified and ligated into the pMD19-T Vector (TakaRa) according to the manufacturer's  
114 instructions. 1 ml suction head was used to blow and absorb the bacteria at the bottom of the  
115 centrifuge, and then 20-40  $\mu$ l of the cells were coated on LB AGAR plate medium containing X-  
116 Gal, IPTG and Amp for overnight culture at 37°C, to form a single colony. White clones were  
117 selected and underlined on LB-Amp plates, and cultured overnight at 37°C. The screened positive  
118 clones were sent to the sequencing company for sequencing, which were screened with the primers  
119 M13-47 (5'-CAGCAC TGA CCC TTT TGG GAC CGC-3') and RV-M (5'GAG CGG ATA ACA  
120 ATT TCA CAC AGG-3'). Enter the results into NCBI GeneBank database and perform Blast search  
121 to obtain similar gene sequences. Phylogenetic tree was constructed with MEGA software and NJ

122 method (neighbor-joining).

## 123 2.4 Statistical analysis

124 All the results were summarized and figured in Excel. Statistical comparisons were performed using  
125 SPSS v.18.0 software with the two-way ANOVA analysis of variance test. A probability was  
126 defined with a least significant difference at two sides of  $P < 0.05$ .

## 127 3. Results and discussion

### 128 3.1 Biodegradation estimated by accumulative amount of CO<sub>2</sub>

129 Rapid decrease of total organic carbon and increase of cumulative CO<sub>2</sub> amount coincided with the  
130 biodegradation of organic matter and the rise of temperature during composting (Wong and Fang,  
131 2000). As shown in Fig. 2A, similar CO<sub>2</sub> emission amount were observed in the first 7 days when  
132 the ventilation rate was 0.18 L·min<sup>-1</sup>·kg<sup>-1</sup> DM, suggested the easily-degraded organic matter was  
133 degraded and transferred to CO<sub>2</sub>. Then the decreased rates in T2-T5 indicated that the easily-  
134 degraded organic matter were less in these treatments than T1. For the concentrations of cellulose  
135 and lignin were higher in saw dust, pine bark and peanut hull, when compared with wheat straw,  
136 while cellulose and lignin were hard to be biodegraded directly (Chang et al., 2019b). Woody peat  
137 is rich in carbon and humus but unavailable for microbes, so that the CO<sub>2</sub> amount was lower than  
138 that in T1. Similar result was observed in Chang et al. (2019b), in which woody peat and corn stalk  
139 were used in vegetable wastes or sewage sludge composting. When the ventilation rate was  
140 increased to 0.36 L·min<sup>-1</sup>·kg<sup>-1</sup> DM, less CO<sub>2</sub> emission amount were observed in S1, S3 and S5(Fig.  
141 2B), suggested that the ventilation rate of 0.18 L·min<sup>-1</sup>·kg<sup>-1</sup> corresponded to a higher biodegradation

142 than  $0.36 \text{ L}\cdot\text{min}^{-1}\cdot\text{kg}^{-1} \text{ DM}$  in the current study. Significant differences were observed after the  
143 first 7 days. As shown in [Qasim et al. \(2019\)](#), in the ventilation range of  $0.3\text{-}0.9 \text{ L}\cdot\text{min}^{-1}\cdot\text{kg}^{-1} \text{ DM}$   
144 when composting with poultry manure and sawdust, the low aeration rate ( $0.3 \text{ L}\cdot\text{min}^{-1}\cdot\text{kg}^{-1} \text{ DM}$ )  
145 corresponded to a higher and longer thermophilic phase than did the high aeration rate ( $0.9 \text{ L}\cdot\text{min}^{-1}\cdot\text{kg}^{-1} \text{ DM}$ ). The  $\text{CO}_2$  volatilization was directly related to the temperature profile of the substrate,  
146 shown as significant differences in the 2<sup>nd</sup> and 3<sup>rd</sup> weeks of composting but none in 1<sup>st</sup> week. What's  
147 more, several previous studies have recommended the aeration methods and rates as,  $0.44 \text{ L}\cdot\text{min}^{-1}\cdot\text{kg}^{-1} \text{ DM}$   
148 in the composting of maize stalks and cow feces ([Nada, 2015](#)),  $0.62 \text{ L}\cdot\text{min}^{-1}\cdot\text{kg}^{-1} \text{ DM}$  volatile  
149 solids (VS) in the composting of vegetable and fruit wastes ([Arslan et al., 2011](#)),  $0.5 \text{ L}\cdot\text{min}^{-1}\cdot\text{kg}^{-1} \text{ DM}$   
150 in the composting of chicken manure and sawdust ([Gao et al., 2010](#)),  $0.25 \text{ L}\cdot\text{min}^{-1}\cdot\text{kg}^{-1} \text{ DM}$  in  
151 the composting of dairy manure with rice straw ([Li et al., 2008](#)),  $0.43\text{-}0.86 \text{ L}\cdot\text{min}^{-1}\cdot\text{kg}^{-1} \text{ DM}$  in the  
152 composting of food waste ([Lu et al., 2001](#)), etc. All of these suggested that the aeration rate should  
153 be set according to the compost material and composting process, based on the oxygen needed and  
154 supplied during the process.

### 156 3.2 Physiochemical characteristics

157 The appropriate pH range for maintaining high microbial activity during composting is 7-8, which  
158 would be changed along with the biodegradation of organic matter. For the complex components  
159 were degraded to organic acids and then to  $\text{CO}_2$ , meanwhile  $\text{CO}_2$ ,  $\text{NH}_3$ , other gases and volatile  
160 organic acids were emitted from the composting system ([Eklind and Kirchmann, 2000](#)). As shown  
161 in Fig.3A, the pH values in all the treatments were in the range of 6.8~8.4, suggested the carbon  
162 additives made no difference on the biodegradation process. Even the additives used in current



163 experiment changed pH value of the products, the final value were all in the range of 7.0~8.2, which  
164 is good for agricultural utilization (Maso and Blasi., 2008). The pH value in T2 was lower than  
165 others, indicated the potential advantage of woody peat, to reduce the NH<sub>3</sub> emission by decreasing  
166 the material pH value. Increase of the aeration rate quickly increased the pH values (Fig. 3B), for  
167 the gases and volatile organic acids were forced to emitted more frequently than in the low aeration  
168 rate treatments. Then the reduction of biodegradation resulted in stable change of pH value, similar  
169 as those shown in the low aeration rate treatments. The final pH values of products in S1-S3 were  
170 higher than those in T1-T3.

171 For the compost products are always used as organic amendments or organic fertilizer in soil (Liu  
172 et al., 2011), EC should be under 4 mS·cm<sup>-1</sup>, which reflects no inhibitory effects on plant growth  
173 from the compost products (Li et al., 2007). A slightly decrease was shown in the first several days  
174 for almost every treatment, followed with a stable value till the end (Fig. 3C and 3D). The carbon  
175 additives influenced the EC variation, while they were always in the safe range, except 4.37 mS·cm<sup>-1</sup>  
176 in T1. For more biodegradation happened in T1, which was indicated by the CO<sub>2</sub> production and  
177 temperature. Woody peat used in T2 reduced the EC in the whole process, because of the absorption  
178 caused by its rich humic acid. The rapid emission of gases and volatile organic acids in treatments  
179 with high aeration rate also reduced the EC value caused.

180 To avoid the toxic effects on plant growth resulted from the toxic substances, such as short-chain  
181 fatty acids, GI is always used as an important index to evaluate whether compost is mature enough.  
182 A minimum value of 80% is considered to indicate the compost mature at an extraction ratio of 1:5  
183 (compost: water wet w/v). As shown in Fig. 3E and Fig. 3F, the GIs increased with the  
184 decomposition of toxic materials, especially in the 1<sup>st</sup> week. Nearly all the GIs were higher than 80%

185 in the treatments, except T4 in series I, and S1 and S3 in series II. Then the GIs keep slightly  
186 increasing till the end of the process, with the GIs over 100%. The results indicated that the five  
187 organic wastes chose in the current study all could be used to be composted with chicken manure, by  
188 adjusting the free air space and C/N. While the higher aeration rate ( $0.36 \text{ L}\cdot\text{min}^{-1}\cdot\text{kg}^{-1} \text{ DM}$ ) decreased  
189 the maturity process. However, it was opposite in a pig manure composting from [Guo et al. \(2012\)](#),  
190 the suitable aeration was  $0.48 \text{ L}\cdot\text{min}^{-1}\cdot\text{kg}^{-1} \text{ DM}$  when considering the maturity ([Guo et al., 2012](#)),  
191 even the lower aeration rate ( $0.24 \text{ L}\cdot\text{min}^{-1}\cdot\text{kg}^{-1} \text{ DM}$ ) had better performance on biodegradation. The  
192 reasons should be complex, one is the aeration was intermittent in [Guo et al., \(2012\)](#) so that higher  
193 aeration rate could supply enough  $\text{O}_2$  than lower one. The other is that lower C/N of the mixed  
194 materials ( $< 20$ ) make high concentration of TAN (total ammonium nitrogen) in the materials, which  
195 would inhibit the seedling.

### 196 3.3 $\text{NH}_3$ emission and nitrogen concentrations

197 The changes of accumulative  $\text{NH}_3$  emission amount during the composting of chicken manure with  
198 different additives and different ventilation rates were shown in Fig. 4A and Fig. 4B. Generally, the  
199 accumulative amounts rapidly increased from the beginning to the 10<sup>th</sup> day in T1-T3, while to the  
200 20<sup>th</sup> day in T4 and T5. Then the amount increased slowly till the end of the process. The significantly  
201 lower cumulative  $\text{NH}_3$  emission in T2 (15.86 mg) was related to the characteristics of woody peat,  
202 than those with straw, which were widely used as additives during manure composting. Low pH  
203 and rich of humic acid contributed to the absorption of  $\text{NH}_4^+$ , which was proved by previous studies  
204 ([Chang et al., 2019b](#)). More cumulative  $\text{NH}_3$  amounts were observed in T3-T5 than that in T1, which  
205 may be related with the lower biodegradable organic carbon in the mixed materials. For there are

206 high concentrations of lignocellulose in saw dust, pine bark and peanut hull, which may decrease  
207 the biodegradable C/N and increase the NH<sub>3</sub> emission (Chang et al., 2019b). Comparing treatments  
208 with the same compost materials, S1 had significantly higher cumulative NH<sub>3</sub> losses (by 117.70%)  
209 compared with T1, S3 (by 25.55%) with T3, and S5 (by 38.14%) with T5. Which suggested the  
210 increased aeration rate led to higher cumulative NH<sub>3</sub> losses.

211 During the composting, the TN always increase from the initial to the end, because of the  
212 concentration effect caused by the significant organic decomposition (Chan et al., 2016). In current  
213 study, most of the treatments were consistent with this theory, except T5 and S5, in which the peanut  
214 hull was used as carbon additives (Table 3). For their NH<sub>3</sub> emission were really high when compared  
215 with other treatments, shown as 69.79 mg and 96.41 mg (Table 3). What's more, less matter loss  
216 resulted from less organic decomposition decreased the concentration effect, for a high ratio of  
217 peanut hull was mixed with the chicken manure, which contained high concentrations of cellulose  
218 and lignin. There are several forms of nitrogen in the compost, among which organic nitrogen (Nor)  
219 and nitrate nitrogen (NO<sub>3</sub><sup>-</sup>-N) are normally stable in the materials and called stable nitrogen (Chang  
220 et al., 2019b), while NH<sub>4</sub><sup>+</sup>-N may transformed to NO<sub>3</sub><sup>-</sup>-N or emitted as NH<sub>3</sub>, when the temperature  
221 was decreased or during the utilization of the compost in arable land. High NH<sub>4</sub><sup>+</sup>-N concentration  
222 in the materials always contributes to high NH<sub>3</sub> emission rate, which was consistent in our study  
223 except T2. The different results indicated the important function of woody peat to absorb and fix  
224 the NH<sub>4</sub><sup>+</sup>-N, because of its porous structure and rich of humus acid (Chang et al., 2019b). Similar  
225 results could be observed when biochar was used during composting (Qiu et al., 2019). More NH<sub>4</sub><sup>+</sup>-  
226 N in treatments T3 and T5 than S3 and S5 (shown in Table 3), suggested high aeration rate helped  
227 to transfer NH<sub>4</sub><sup>+</sup>-N into NH<sub>3</sub> ventilation, so that more NH<sub>3</sub> ventilation were observed in Fig.5 and

228 Table 2. Meanwhile the total nitrogen loss rates were higher in treatments with high aeration rate  
229 resulted from high NH<sub>3</sub> ventilation.

### 230 3.4 Structure of microbial community

231 Compared with the normal additive corn straw, woody peat, saw dust and pine bark increased the  
232 biodiversity at the beginning while peanut hull increased it at the 3<sup>rd</sup> day (Fig. 5(A)). At the  
233 beginning, the most abundant T-RF was 85bp, with the ratio of 100%, 56%, 53%, 44% and 47%, in  
234 T1-T5 respectively. The most abundant T-RFs were shown in the 3<sup>rd</sup> day of T2 and T4, while 7<sup>th</sup>  
235 day of T3 and T5. After then, the numbers decreased significantly. In all the 60 T-RFs shown in the  
236 figures, 139bp, 145bp, 147bp, 174bp, 176bp and 178bp were shown high relative abundance in two  
237 or more treatments in different stages, indicated these T-RFs should be related with the  
238 biodegradation of organic matter. While 158bp in T1, 295bp in T2, 155bp in T3, 140bp in T4 and  
239 132bp in T5 were shown high relative abundance in only this treatment, which should be a signal  
240 that this T-RF should be specific for this additive only. The results suggested the additives in the  
241 current study influenced the microbial community and population, which would result in different  
242 biodegradation process. The increase of the ventilation rate contributed to the higher biodiversity in  
243 all the three treatments (Fig. 6(B)), even it occurred in the first 7 days in S1 and S5 while in later  
244 two weeks in S3.

245 The species distribution of bacteria in composting system can be better understood by constructing  
246 bacterial clone library. In this experiment, five of the compost samples in different treatments were  
247 selected to construct the clone library. Library analysis showed that the 247 sequences belonged to  
248 9 different phyla, among which Firmicutes, Proteobacteria, Bacteroides and Actinomycetes account

249 for 85.83% in the total sequences (Fig. 6(A)). Nearly 70 of the 247 sequences were *Bacillus* spp.,  
250 which belongs to the phylum of Firmicutes. Their character of high-temperature resistance made it  
251 important on organic matter biodegradation during composting (Koyama et al., 2018). The result of  
252 the phylogenetic analysis affiliated with uncultured groups using the neighbor-joining method were  
253 shown in Fig. 6(B). Prominent clones belonged to an uncultured group in the phylum Firmicutes  
254 (class of *Bacilli* and *Clostridia*) and Proteobacteria (class of *Alphaproteobacteria*,  
255 *Deltaproteobacteria* and *Gammaproteobacteria*). Carbon additives used in different treatments  
256 influenced the clones, which were consistent in both Fig. 6(A) and Fig. 6(B). As Qiu et al. (2019)  
257 indicated, the kind of manure and biochar addition would both influence the bacteria community,  
258 especially when the materials were composted different duration. While it is similar that Firmicutes  
259 (class of *Bacilli* and *Clostridia*) and Proteobacteria (class of *Alphaproteobacteria*,  
260 *Deltaproteobacteria* and *Gammaproteobacteria*) were the main categories in the later time of  
261 composting. High proportions of Actinobacteria in the samples of T1 and T3 suggested that the  
262 addition of corn straw or saw dust may facilitate the growth of Actinobacteria and accelerate the  
263 degradation of lignocelluloses during the maturity stage, similar results were observed and proved  
264 in Qiu et al. (2019).

#### 265 4. Conclusion

266 The biodegradation process and the pH, EC and GI values were influenced by the five carbon-based  
267 additives used in our experiment, while no inhibitory on composting maturity were observed. The  
268 aeration rate of  $0.18 \text{ L}\cdot\text{min}^{-1}\cdot\text{kg}^{-1} \text{ DM}$  was more suitable than  $0.36 \text{ L}\cdot\text{min}^{-1}\cdot\text{kg}^{-1} \text{ DM}$  for chicken  
269 manure composting. Woody peat had shown better effect on reducing  $\text{NH}_3$  emission and nitrogen

270 loss, while more NH<sub>3</sub> emission and nitrogen loss were observed when the aeration rate was higher.  
271 The prominent clones of the compost samples belonged to the phylum Firmicutes (class of *Bacilli*  
272 and *Clostridia*) and Proteobacteria (class of *Alphaproteobacteria*, *Deltaproteobacteria* and  
273 *Gammaproteobacteria*). Carbon-based additives and ventilation rates set in our experiment had  
274 made influences on the microbial community, while *Bacillus* spp. was always the most important  
275 one. Therefore, woody peat could be used as carbon-based additives instead of corn straw, and the  
276 suitable ventilation rates could reduce the NH<sub>3</sub> emission and nitrogen loss. Additives and ventilation  
277 rates would not influence the prominent bacteria that used to promote the composting process.

## 278 Acknowledgement

279 Financial supported was provided by National Key R&D Program of China (2018YFC1901000),  
280 China Agriculture Research System (CAR-23-B16) and Shandong Academy of Agricultural  
281 Sciences “Science and Technology Innovation Project” (CXGC2018D06)

## 282 References

- 283 Arslan EI, Ünlü A, Topal M. Determination of the effect of aeration rate on composting of vegetable–fruit wastes.  
284 Clean: Soil, Air, Water. 2011; 39(11): 1014-1021.
- 285 Awasthi M K, Pandey A K, Bundela P S, et al. Co-composting of gelatin industry sludge combined with organic  
286 fraction of municipal solid waste and poultry waste employing zeolite mixed with enriched nitrifying bacterial  
287 consortium. Bioresour Technol. 2016; 213: 181-189.
- 288 Awasthi M K, Wang M, Chen H, et al. Heterogeneity of biochar amendment to improve the carbon and nitrogen  
289 sequestration through reduce the greenhouse gases emissions during sewage sludge composting. Bioresour

- 290 Technol. 2017; 224: 428-438.
- 291 Brito L. M., Mourão I., Coutinho J. et al. Co-composting of invasive *Acacia longifolia* with pine bark for horticultural  
292 use. *Environ Biotechnol.* 2015; 36(13): 1632-1642.
- 293 Chan M T, Selvam A, Wong J W C. Reducing nitrogen loss and salinity during ‘struvite’ food waste composting by  
294 zeolite amendment. *Bioresour Technol.* 2016; 200: 838-844.
- 295 Chang R, Guo Q, Chen Q, et al. Effect of initial material bulk density and easily-degraded organic matter content on  
296 temperature changes during composting of cucumber stalk. *J Environ Sci.* 2019a; 80: 306-315.
- 297 Chang R, Li Y, Chen Q, et al. Comparing the effects of three in situ methods on nitrogen loss control, temperature  
298 dynamics and maturity during composting of agricultural wastes with a stage of temperatures over 70° C. *J*  
299 *Environ Manage.* 2019b; 230: 119-127.
- 300 Clement K, Vaisse C, Lahlou N, et al. A mutation in the human leptin receptor gene causes obesity and pituitary  
301 dysfunction. *Nature.* 1998; 392(6674): 398.
- 302 Eklind Y and Kirchmann H. Composting and storage of organic household waste with different litter amendments.  
303 II: nitrogen turnover and losses. *Bioresour Technol.* 2000; 74 (2): 125–133.
- 304 Erickson M C, Liao J, Jiang X, et al. Inactivation of pathogens during aerobic composting of fresh and aged dairy  
305 manure and different carbon amendments. *J Food Prot.* 2014; 77(11):1911-1918.
- 306 Feng Y, Xu Y, Yu Y, et al. Mechanisms of biochar decreasing methane emission from Chinese paddy soils. *Soil*  
307 *Biol Biochem.* 2012; 46: 80-88.
- 308 Gao MC, Li B, Yu A, et al. The effect of aeration rate on forced-aeration composting of chicken manure and sawdust.  
309 *Bioresour Technol.* 2010; 101(6):1899-1903.
- 310 Guo R, Li G, Jiang T, et al. Effect of aeration rate, C/N ratio and moisture content on the stability and maturity of  
311 compost. *Bioresour Technol.* 2012; 112: 171–178.

- 312 Hageman N, Subdiaga E, Orsetti S, et al. Effect of biochar amendment on compost organic matter composition  
313 following aerobic composting of manure. *Sci Total Environ.* 2018; 613–614: 20–29.
- 314 Hao X, Chang C, Larney F J, et al. Greenhouse gas emissions during cattle feedlot manure composting. *J Environ*  
315 *Qual.* 2001; 30: 376–386.
- 316 Jia W, Qin W, Zhang Q, et al. Evaluation of crop residues and manure production and their geographical distribution  
317 in China. *J Cleaner Prod.* 2018; 188: 954-965.
- 318 Jiang T, Schuchardt F, Li G, et al. Effect of C/N ratio, aeration rate and moisture content on ammonia and greenhouse  
319 gas emission during the composting. *J Environ Sci.* 2011; 23: 1754–1760.
- 320 Koyama M, Nagao N, Syukri F, et al. Effect of temperature on thermophilic composting of aquaculture sludge: NH<sub>3</sub>  
321 recovery, nitrogen mass balance, and microbial community dynamics. *Bioresour Technol.* 2018; 265: 207-213.
- 322 Li C, Li G, Li Y, et al. Fuzzy mathematics-based evaluation of Municipal Solid Waste compost maturities in different  
323 spaces in static tunnel from Nangong compost plant[J]. *Transactions of the Chinese Society of Agricultural*  
324 *Engineering (Transactions of the CSAE), 2007, 23(2): 201-206.*
- 325 Li X, Zhang R, Pang Y. Characteristics of dairy manure composting with rice straw. *Bioresour Technol.* 2008; 99(2):  
326 359-367.
- 327 Liu D, Zhang R, Wu H, et al. Changes in biochemical and microbiological parameters during the period of rapid  
328 composting of dairy manure with rice chaff. *Bioresour Technol.* 2011; 102(19): 9040-9049.
- 329 Lu S, Imai T, Li H, et al. Effect of enforced aeration on in-vessel food waste composting. *Environ Biotechnol.* 2001;  
330 22(10): 1177-1182.
- 331 Mao H, Lv Z, Li R, et al. Improvement of biochar and bacterial powder addition on gaseous emission and bacterial  
332 community in pig manure compost. *Bioresour Technol.* 2018; 258: 195–202.
- 333 Maso MA, Blasi AB. Evaluation of composting as a strategy for managing organic wastes from a municipal market



- 334 in Nicaragua. *Bioresour Technol.* 2008; 99(11): 5120-5124.
- 335 Meng L, Li W, Zhang S, et al. Effect of different extra carbon sources on nitrogen loss control and the change of  
336 bacterial populations in sewage sludge composting. *Ecol Eng.* 2016; 94: 238-243.
- 337 Michel Jr FC, Reddy CA. Effect of oxygenation level on yard trimmings composting rate, odor production, and  
338 compost quality in bench-scale reactors. *Compost Sci Util.* 1998; 6(4): 6-14.
- 339 Nada WM. Stability and maturity of maize stalks compost as affected by aeration rate, C/N ratio and moisture content.  
340 *J Soil Sci Plant Nutr.* 2015; 15(3): 751-764.
- 341 Osada T, Kuroda K, Yonaga M. Determination of nitrous oxide, methane and ammonia emissions from a swine  
342 manure composting process. *J Mater Cycles Waste Manage.* 2000; 2(1): 51-56.
- 343 Park K H, Jeon J H, Jeon K H, et al. Low greenhouse gas emissions during composting of solid swine manure. *Anim.*  
344 *Feed Sci Technol.* 2011; 166-167: 550-556.
- 345 Qasim W, Moon BE, Okyere FG, et al. Influence of aeration rate and reactor shape on the composting of poultry  
346 manure and sawdust. *J Air Waste Manage Assoc.* 2019; 69(5): 633-645.
- 347 Qiu X, Zhou G, Zhang J, et al. Microbial community responses to biochar addition when a green waste and manure  
348 mix are composted: A molecular ecological network analysis. *Bioresour Technol.* 2019; 273: 666-671.
- 349 Sharma D, Yadav K D, Kumar S. Role of sawdust and cow dung on compost maturity during rotary drum composting  
350 of flower waste. *Bioresour Technol.* 2018; 264: 285-289.
- 351 Shen Y, Ren L, Li G, et al. Influence of aeration on CH<sub>4</sub>, N<sub>2</sub>O and NH<sub>3</sub> emissions during aerobic composting of a  
352 chicken manure and high C/N waste mixture. *Waste Manage.* 2011; 31: 33-38.
- 353 Shi M, Wei Z, Wang L, et al. Response of humic acid formation to elevated nitrate during chicken manure  
354 composting. *Bioresour Technol.* 2018; 258: 390-394.
- 355 Wang K, Li W, Li X, et al. Spatial nitrifications of microbial processes during composting of swine, cow and chicken

- 356 manure. *Sci Rep.* 2015; 5:14932.
- 357 Wang Q, Awasthi MK, Zhao J, et al. Improvement of pig manure compost lignocellulose degradation, organic matter  
358 humification and compost quality with medical stone. *Bioresour Technol.* 2017; 243:771-777.
- 359 Wang Q, Wang Z, Awasthi M K, et al. Evaluation of medical stone amendment for the reduction of nitrogen loss  
360 and bioavailability of heavy metals during pig manure composting. *Bioresour Technol.* 2016; 220:297-304.
- 361 Zhang J, Lü Fan, Shao L, et al. The use of biochar-amended composting to improve the humification and degradation  
362 of sewage sludge. *Bioresour Technol.* 2014; 168:252-258.

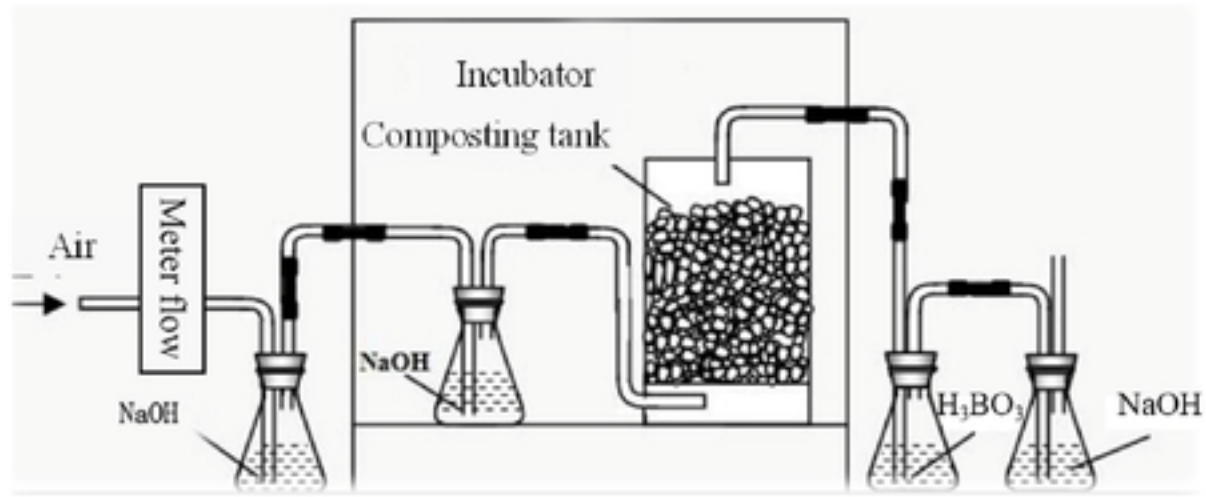

Fig 1. Diagram of composting system

bioRxiv preprint doi: <https://doi.org/10.1101/2020.02.19.956029>; this version posted February 19, 2020. The copyright holder for this preprint (which was not certified by peer review) is the author/funder, who has granted bioRxiv a license to display the preprint in perpetuity. It is made available under a [CC-BY 4.0 International license](#).

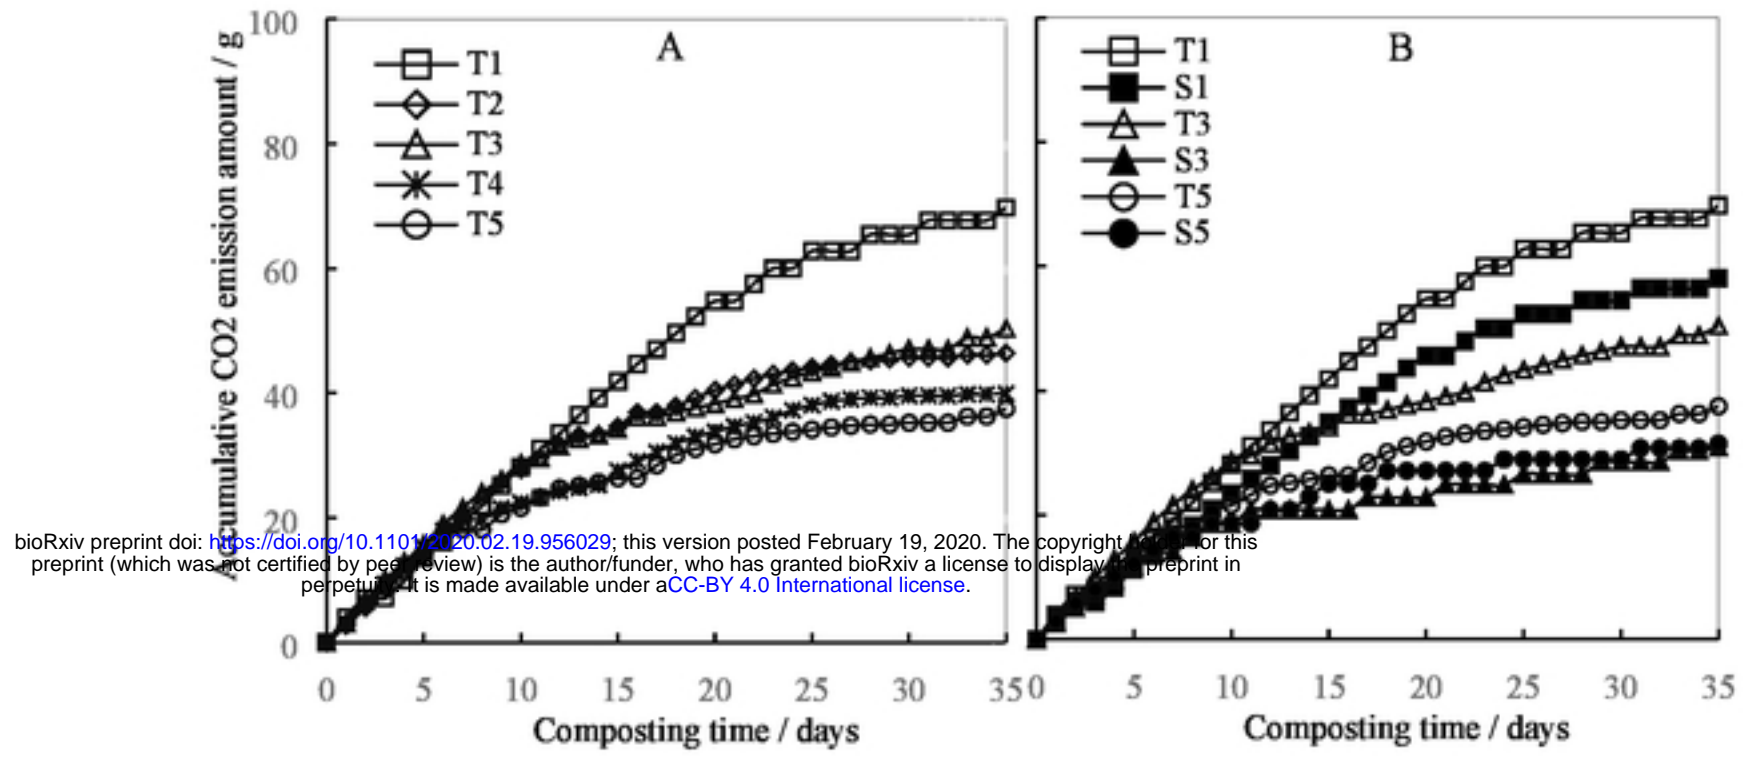

Fig. 2 Effects of carbon-based additives and ventilation rate on CO<sub>2</sub> emissions during chicken manure composting.

bioRxiv preprint doi: <https://doi.org/10.1101/2020.02.19.956029>; this version posted February 19, 2020. The copyright holder for this preprint (which was not certified by peer review) is the author/funder, who has granted bioRxiv a license to display the preprint in perpetuity. It is made available under aCC-BY 4.0 International license.

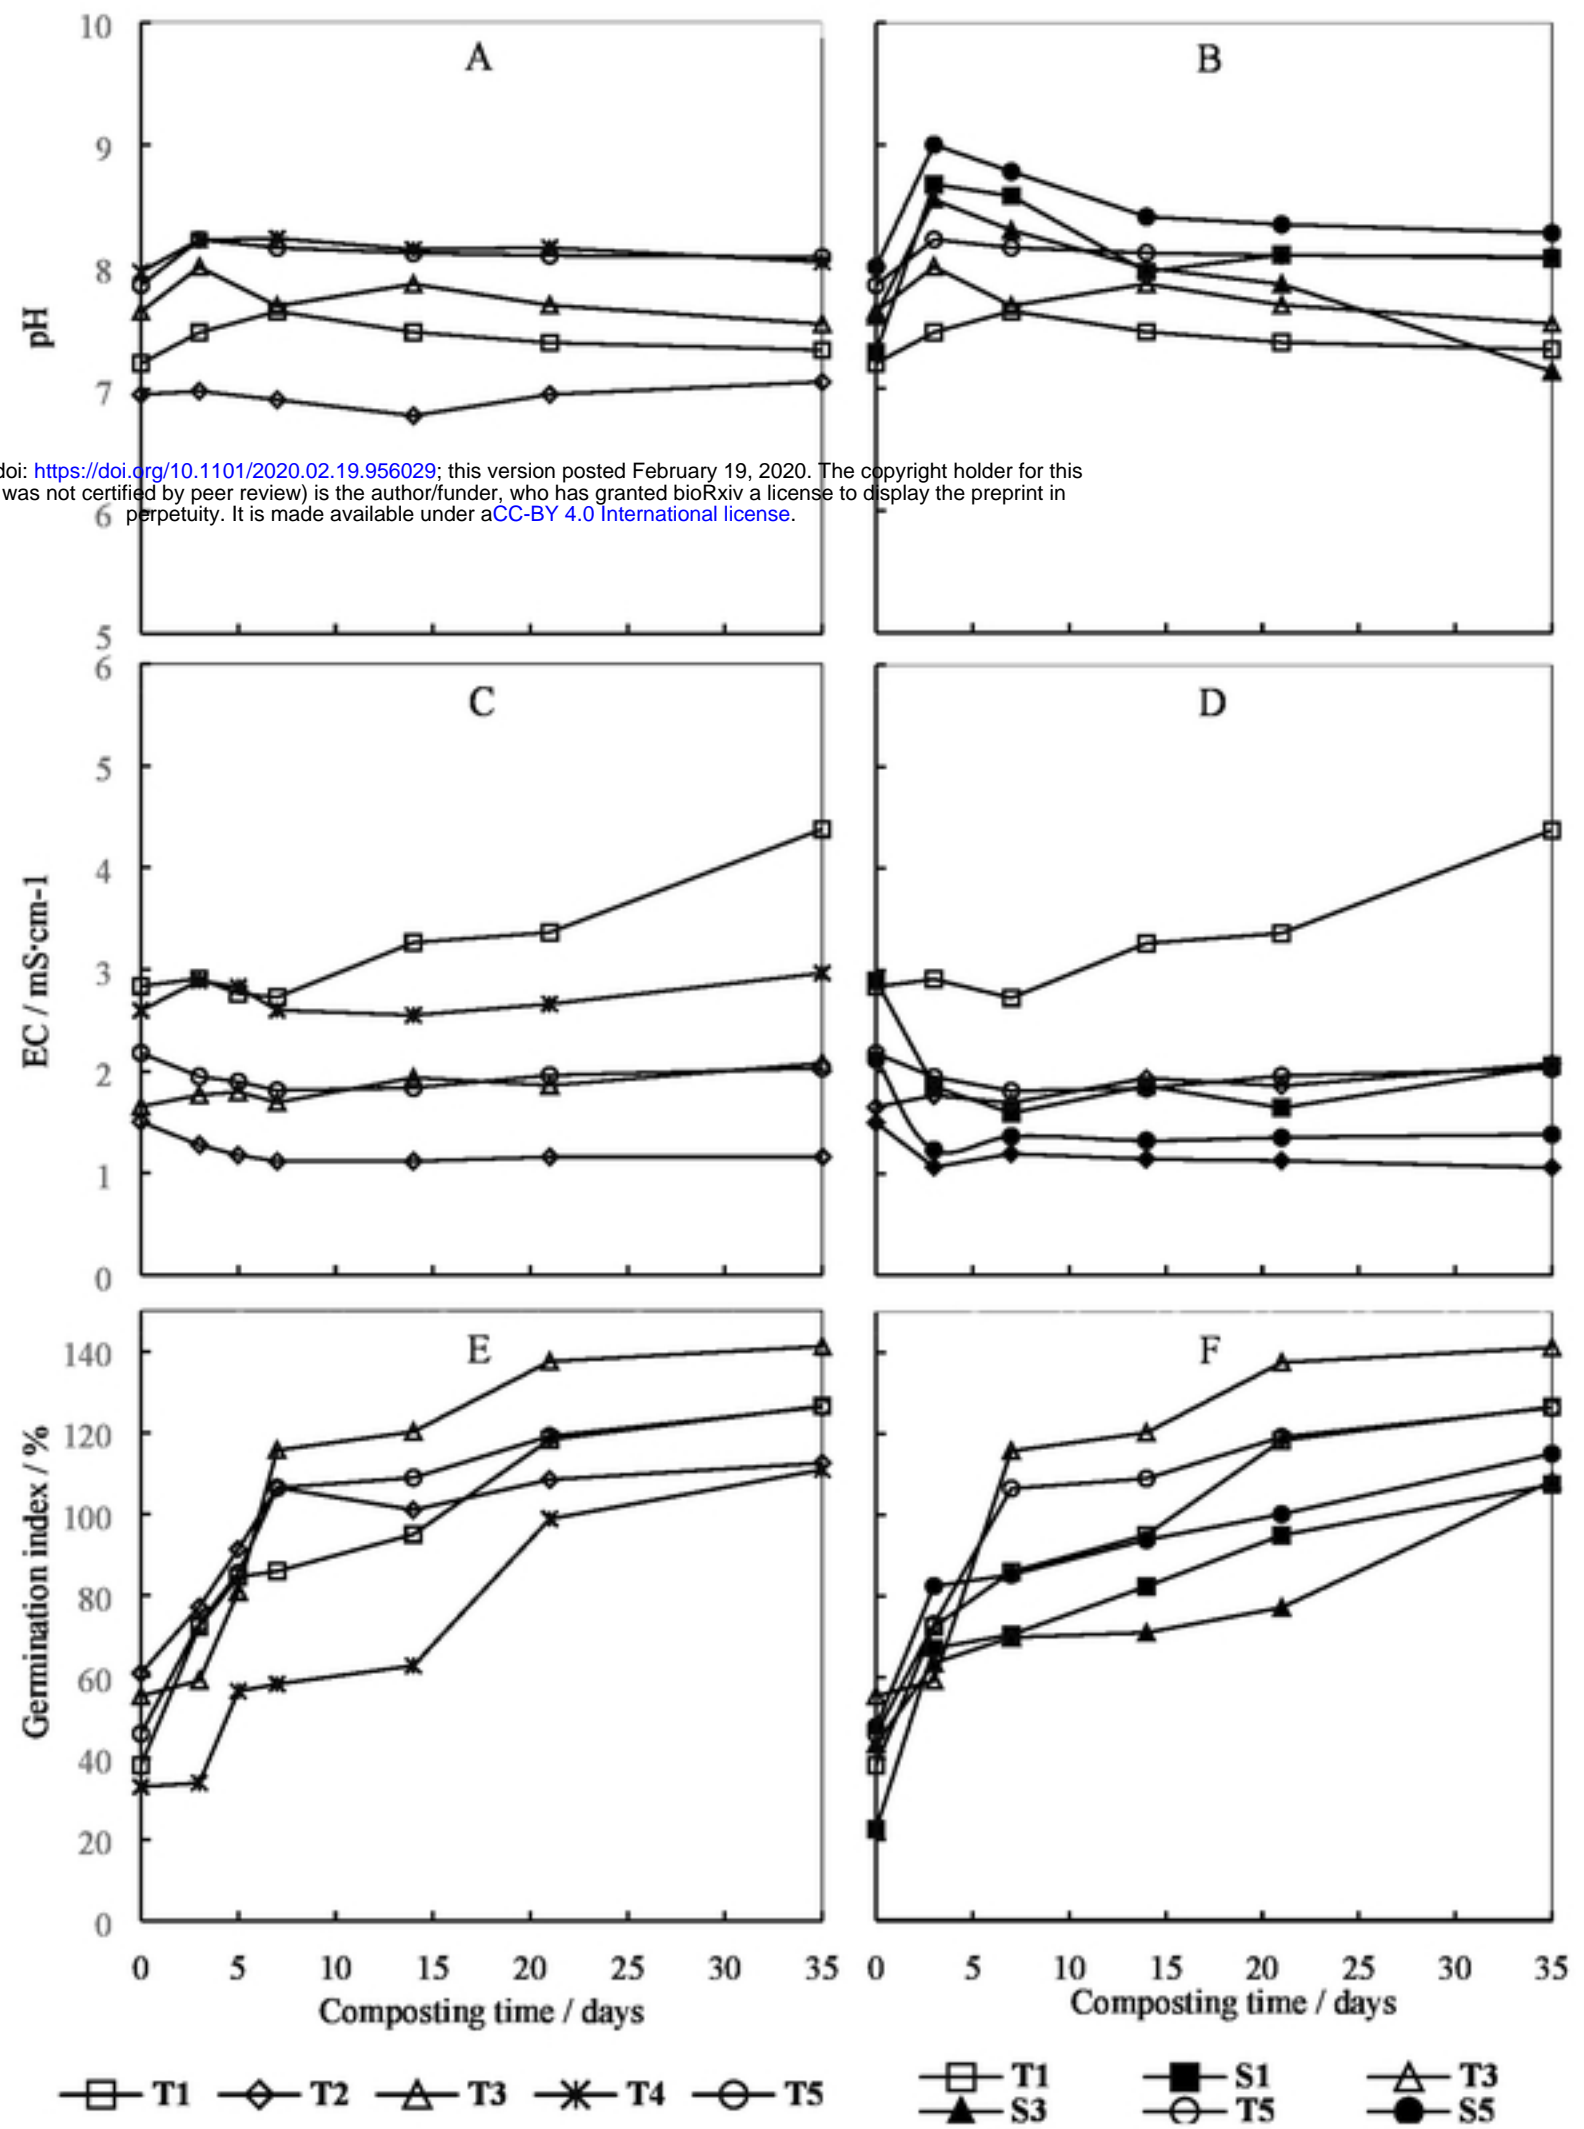

Fig. 3 Effects of carbon-based additives and ventilation rate on physiochemical characteristics during chicken

manure composting

bioRxiv preprint doi: <https://doi.org/10.1101/2020.02.19.956029>; this version posted February 19, 2020. The copyright holder for this preprint (which was not certified by peer review) is the author/funder, who has granted bioRxiv a license to display the preprint in perpetuity. It is made available under a [CC-BY 4.0 International license](#).

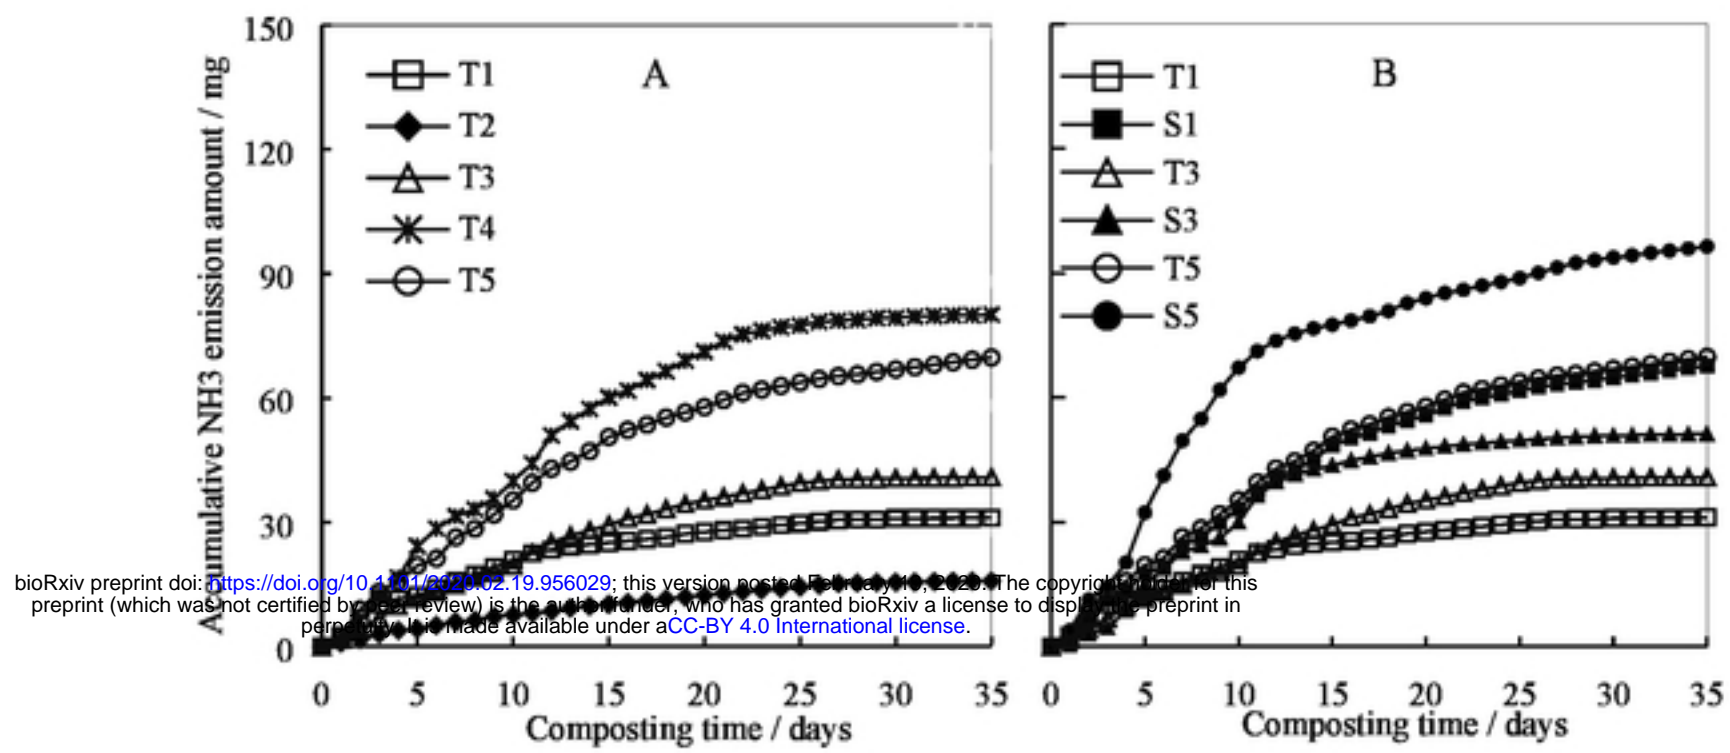

Fig. 4 Effects of carbon-based additives and ventilation rate on NH<sub>3</sub> emissions during chicken manure composting.

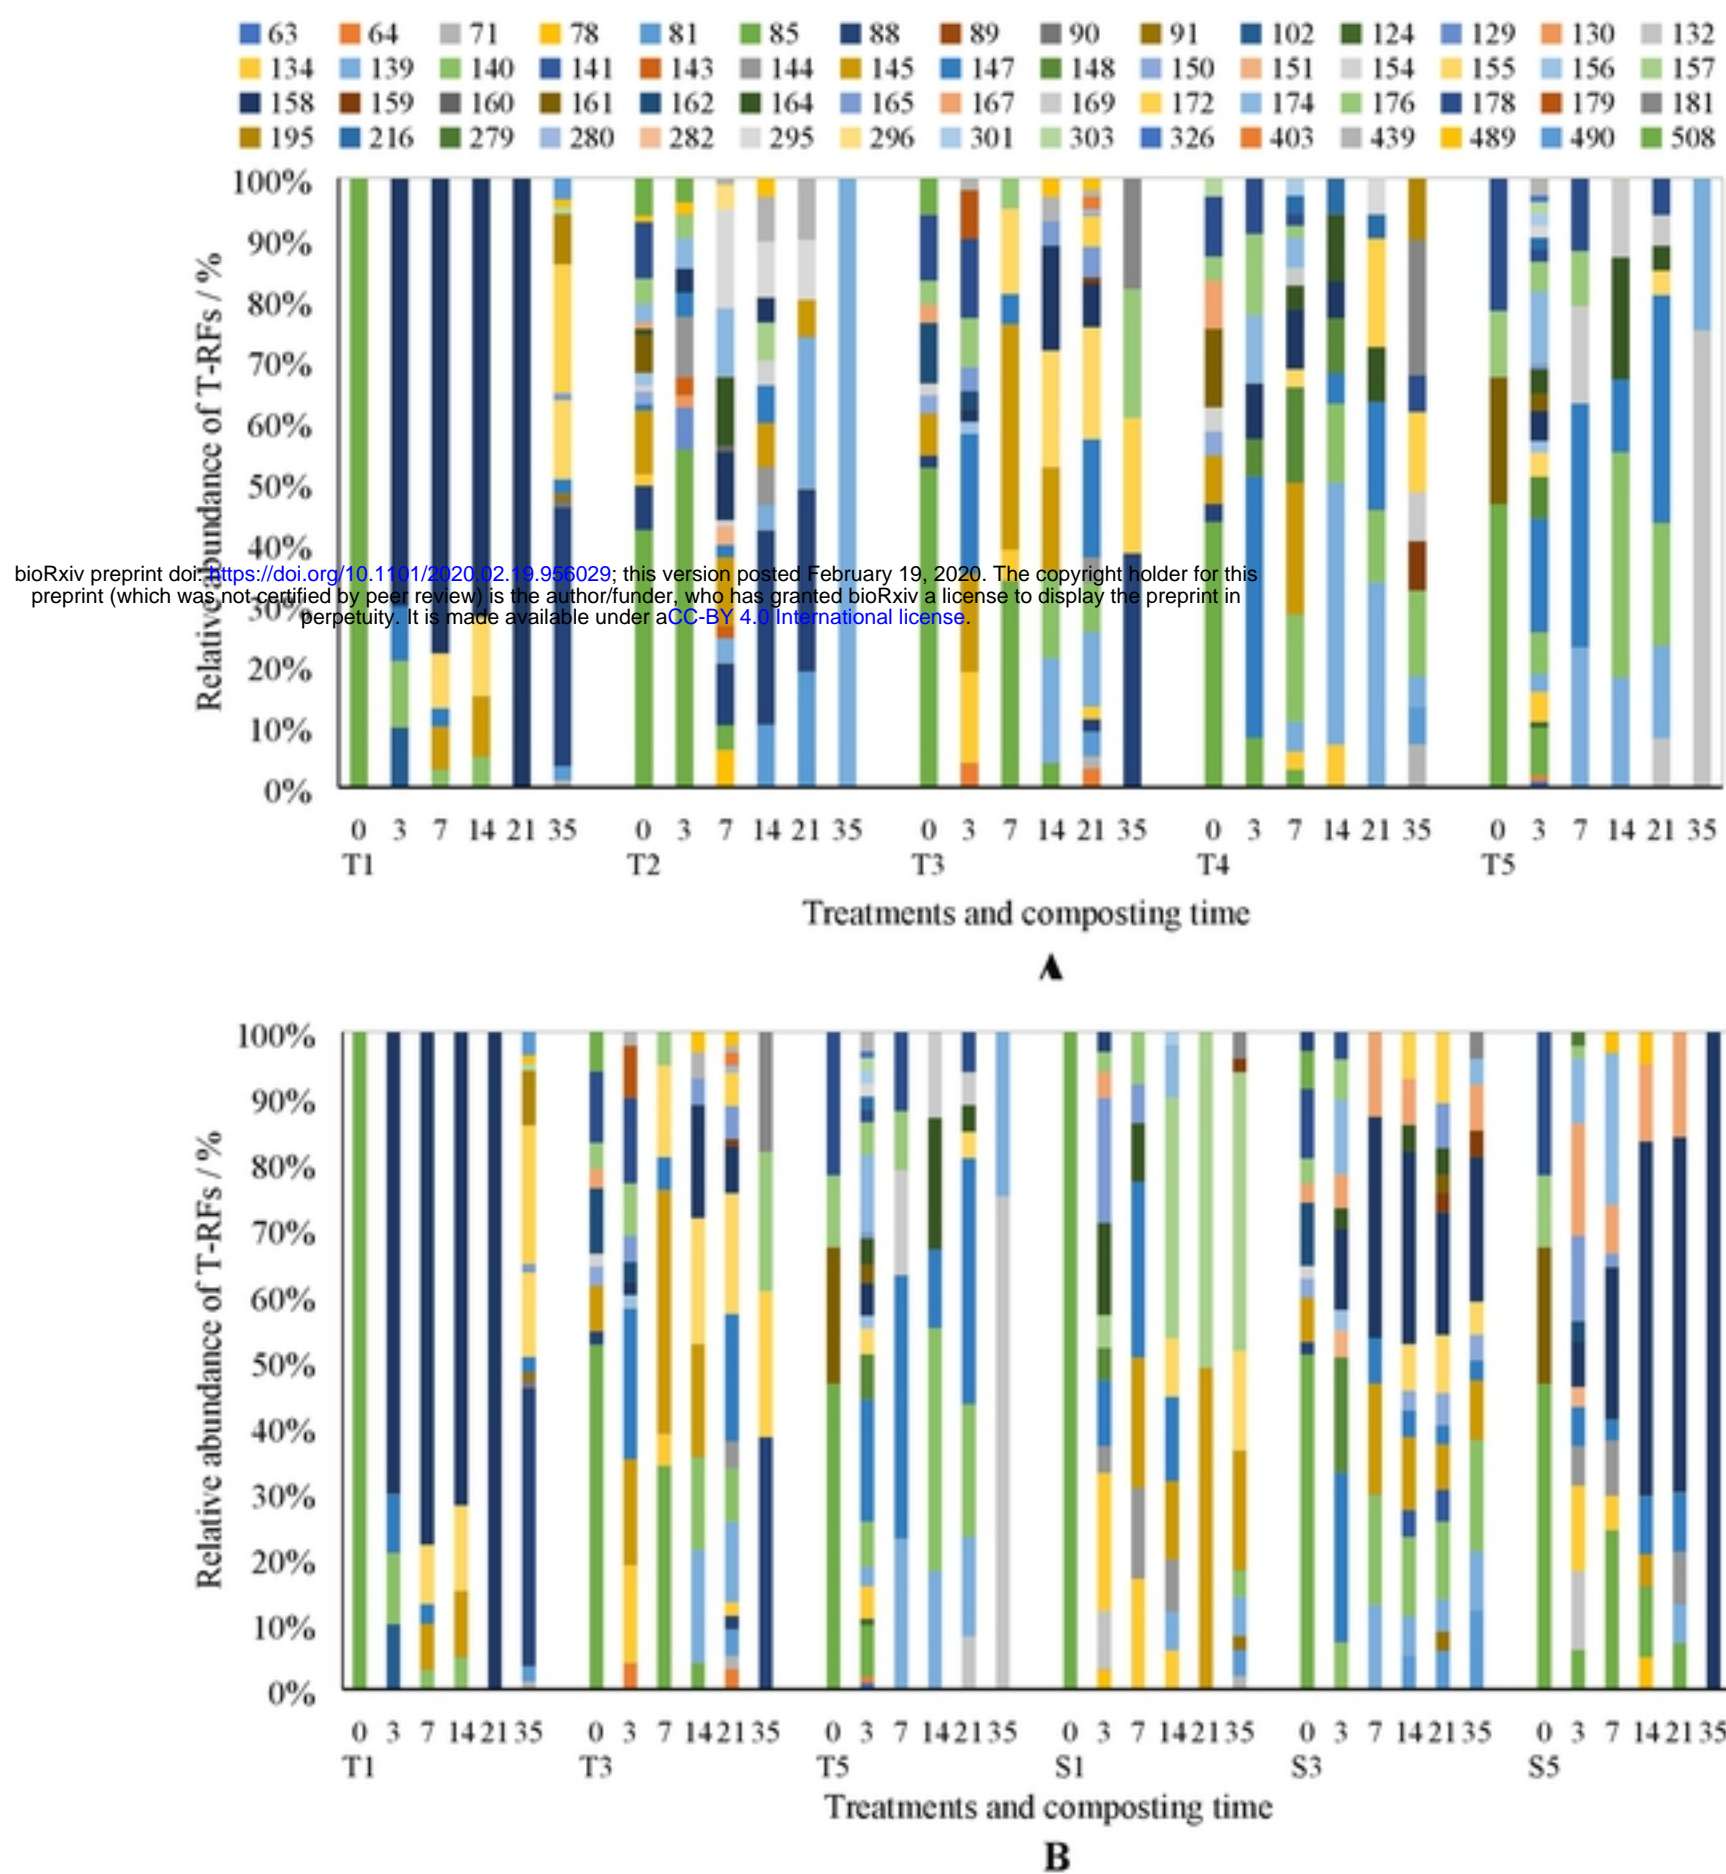

**Fig. 5** Effects of carbon-based additives (A) and ventilation rate (B) on relative abundance of T-RFs during chicken manure composting.



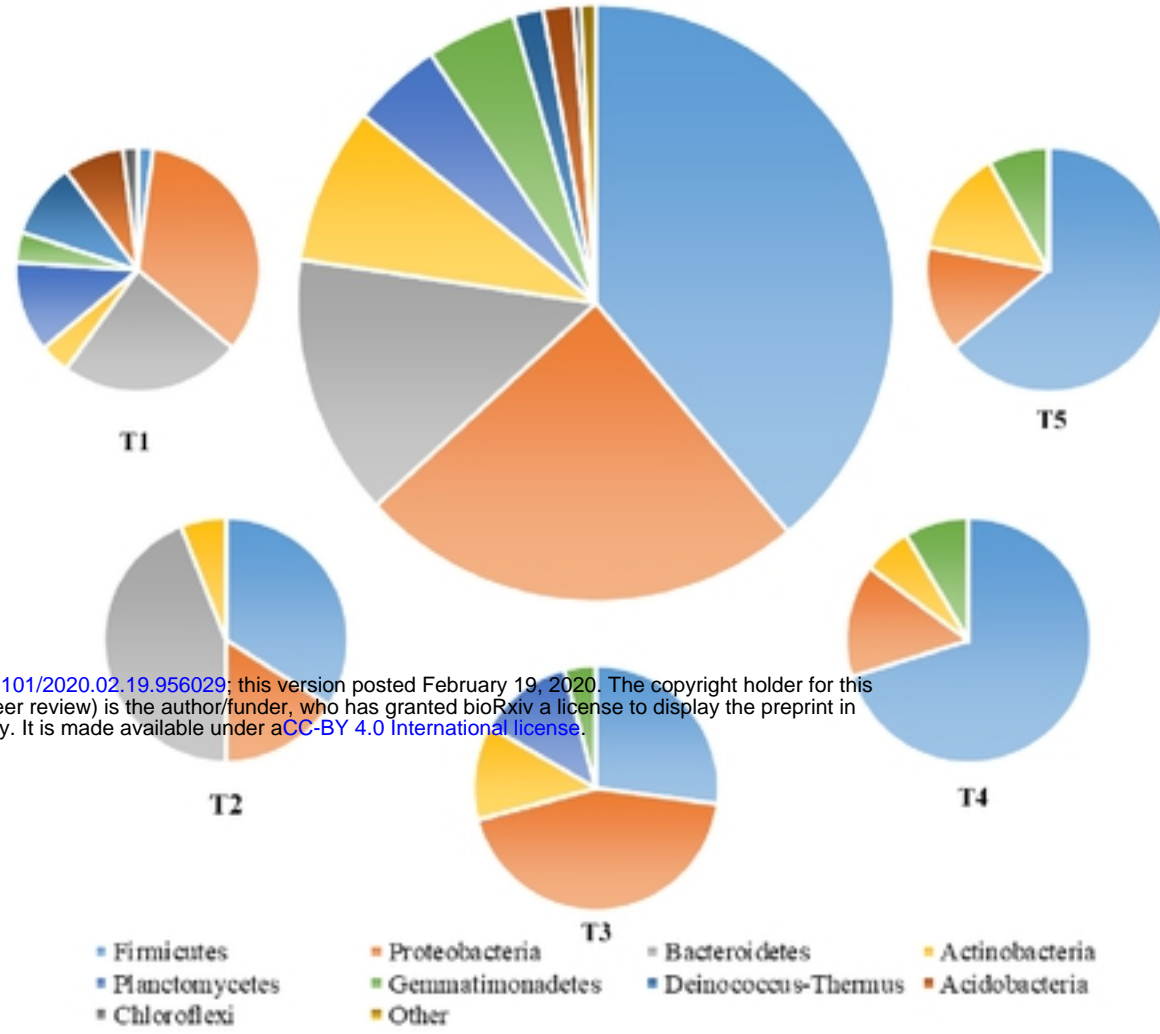

bioRxiv preprint doi: <https://doi.org/10.1101/2020.02.19.956029>; this version posted February 19, 2020. The copyright holder for this preprint (which was not certified by peer review) is the author/funder, who has granted bioRxiv a license to display the preprint in perpetuity. It is made available under aCC-BY 4.0 International license.

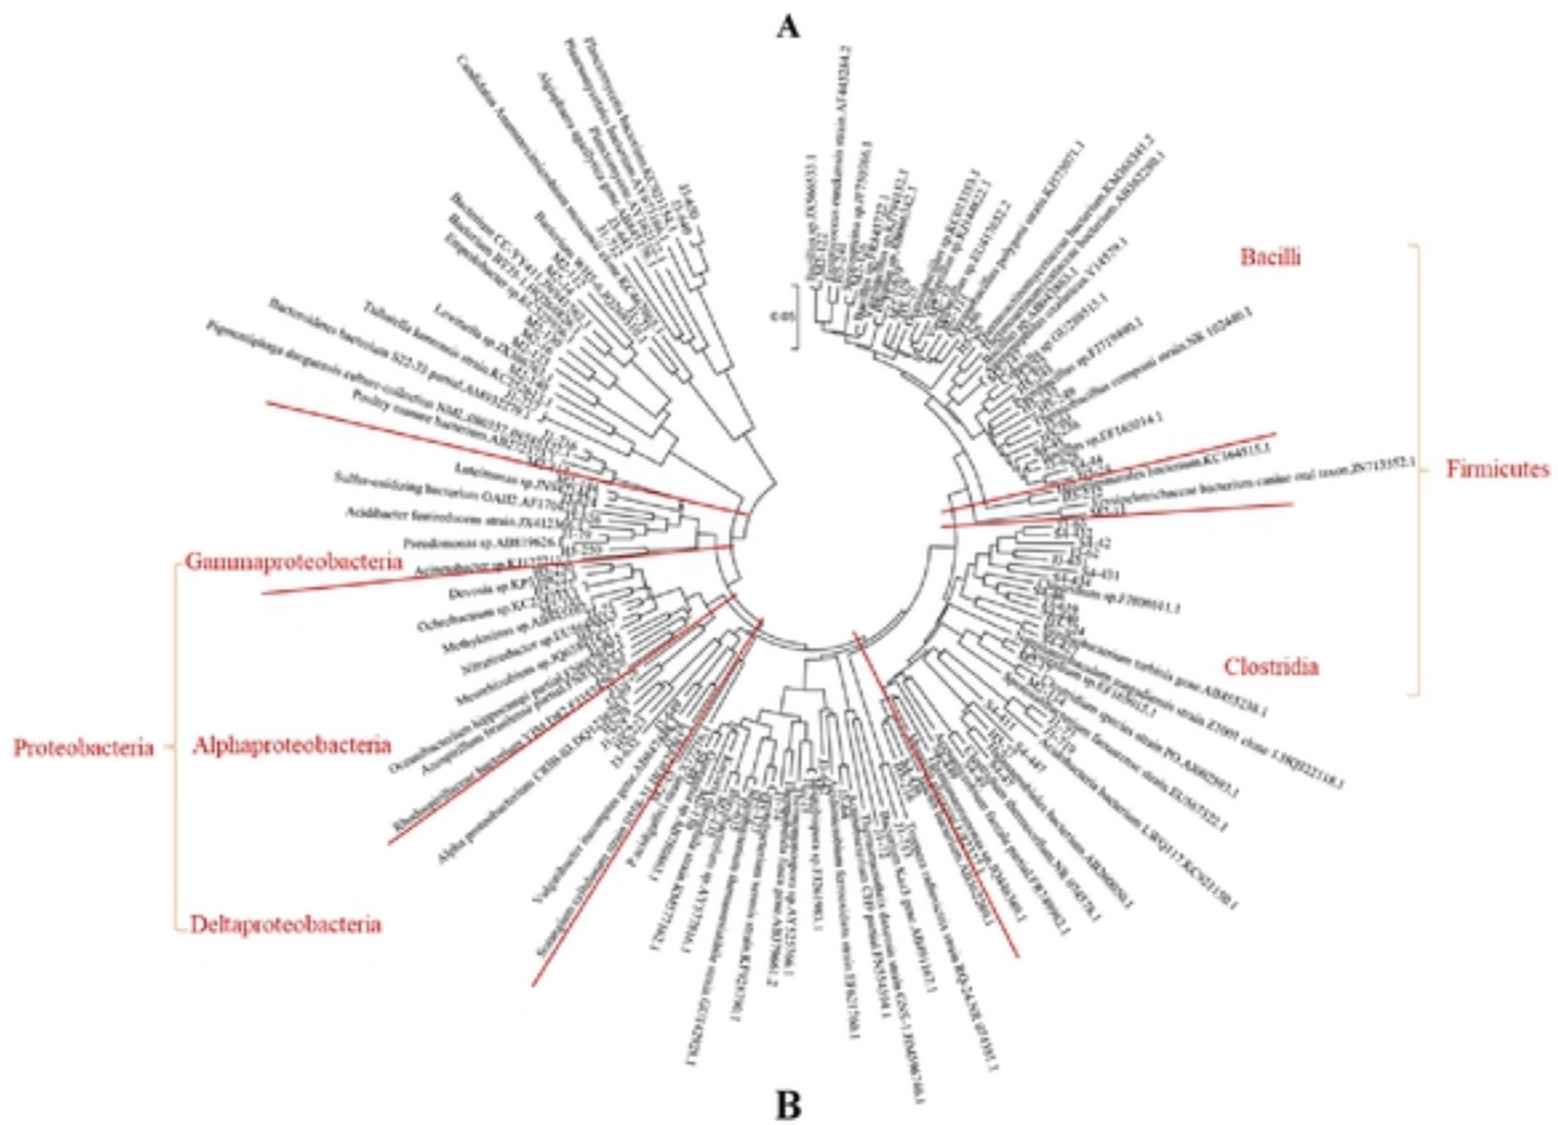

Fig. 6 Composition of 247 sequences in 5 compost samples based on the bacteria clone library analysis (A) and their phylogenetic analysis (shown as OUT and restriction enzyme cutting site) (B)

**Table 1 Physical and chemical properties of the materials**

| <b>Materials</b> | <b>Total carbon content / %</b> | <b>Total nitrogen content / %</b> | <b>C/N</b> | <b>Moisture / %</b> | <b>Cellulose / %</b> | <b>Lignin / %</b> |
|------------------|---------------------------------|-----------------------------------|------------|---------------------|----------------------|-------------------|
| Chicken manure   | 37.63                           | 4.33                              | 8.69       | 81.28               | 13.06                | 9.06              |
| Wheat straw      | 62.35                           | 0.73                              | 85.41      | 7.14                | 42.03                | 8.86              |
| Woody peat       | 62.84                           | 0.59                              | 196.51     | 14.04               | 2.92                 | 28.91             |
| Saw dust         | 67.70                           | 0.41                              | 165.12     | 8.33                | 50.85                | 17.39             |
| Pine bark        | 73.52                           | 0.44                              | 167.09     | 8.79                | 61.62                | 31.22             |
| Peanut hull      | 52.77                           | 1.06                              | 49.78      | 7.85                | 64.10                | 25.65             |

bioRxiv preprint doi: <https://doi.org/10.1101/2020.02.19.956029>; this version posted February 19, 2020. The copyright holder for this preprint (which was not certified by peer review) is the author/funder, who has granted bioRxiv a license to display the preprint in perpetuity. It is made available under a [CC-BY 4.0 International license](#).

Table 2 Experiment design of different resource carbon

| Treatments |    | Raw materials mixed ratio (Fresh matter) | C/N  | Ventilation rate /<br>L·min <sup>-1</sup> ·kg <sup>-1</sup> DM |
|------------|----|------------------------------------------|------|----------------------------------------------------------------|
| Series 1   | T1 | Chicken manure: wheat straw = 1:0.323    | 25:1 | 0.18                                                           |
|            | T2 | Chicken manure: woody peat = 1:0.321     |      |                                                                |
|            | T3 | Chicken manure: saw dust = 1: 0.251      |      |                                                                |
|            | T4 | Chicken manure: pine bark = 1:0.232      |      |                                                                |
|            | T5 | Chicken manure: peanut hull = 1:0.548    |      |                                                                |
| Series 2   | T1 | Chicken manure: wheat straw = 1:0.323    | 25:1 | 0.18                                                           |
|            | S1 |                                          |      | 0.36                                                           |
|            | T3 | Chicken manure: saw dust = 1: 0.251      |      | 0.18                                                           |
|            | S3 |                                          |      | 0.36                                                           |
|            | T5 | Chicken manure: peanut hull = 1:0.548    |      | 0.18                                                           |
|            | S5 |                                          | 0.36 |                                                                |

bioRxiv preprint doi: <https://doi.org/10.1101/2020.02.19.956029>; this version posted February 19, 2020. The copyright holder for this preprint (which was not certified by peer review) is the author/funder, who has granted bioRxiv a license to display the preprint in perpetuity. It is made available under aCC-BY 4.0 International license.

Table 3 Nitrogen transformation and nitrogen loss in all treatments

| Treatments | TN / g·kg <sup>-1</sup> |       | Ammonium nitrogen / mg·kg <sup>-1</sup> |         | Total NH <sub>3</sub> emission amount / mg | TN loss / % |       |
|------------|-------------------------|-------|-----------------------------------------|---------|--------------------------------------------|-------------|-------|
|            | Initial                 | End   | Initial                                 | End     |                                            |             |       |
| Series 1   | T1                      | 21.55 | 23.52                                   | 759.07  | 105.40                                     | 31.08       | 24.26 |
|            | T2                      | 19.03 | 21.60                                   | 1310.33 | 840.73                                     | 15.86       | 4.02  |
|            | T3                      | 23.89 | 26.44                                   | 963.93  | 212.07                                     | 40.79       | 28.45 |
|            | T4                      | 19.85 | 20.65                                   | 1632.33 | 817.20                                     | 80.13       | 34.24 |
|            | T5                      | 20.88 | 16.68                                   | 1236.73 | 877.80                                     | 69.79       | 32.74 |
| Series 2   | T1                      | 21.55 | 23.52                                   | 759.07  | 105.40                                     | 31.08       | 24.26 |
|            | S1                      | 21.55 | 22.19                                   | 759.07  | 138.80                                     | 67.66       | 35.75 |
|            | T3                      | 23.89 | 26.44                                   | 963.93  | 212.07                                     | 40.79       | 28.45 |
|            | S3                      | 23.89 | 27.08                                   | 963.93  | 149.80                                     | 51.21       | 29.51 |
|            | T5                      | 20.88 | 16.68                                   | 1236.73 | 877.80                                     | 69.79       | 32.74 |
| S5         | 20.88                   | 16.73 | 1236.73                                 | 494.30  | 96.41                                      | 36.24       |       |

bioRxiv preprint doi: <https://doi.org/10.1101/2020.02.19.356829>; this version posted February 19, 2020. The copyright holder for this preprint (which was not certified by peer review) is the author/funder, who has granted bioRxiv a license to display the preprint in perpetuity. It is made available under aCC-BY 4.0 International license.
